# Supplementary material for: Unraveling the mechanism and impact of oxide production in LA-ICP-MS by comprehensive analysis of REE-Th-U phosphates
Source: Royal Society of Chemistry journal article supplement (doi:10.1039/c7ja00182g), 2017-01-01
Supplement: c7ja00182g2.xlsx [file c7ja00182g2.xlsx]

## Sheet: Phosphates
Results of LA-ICP-MS analyses of the phosphates
Synthetic REE phosphates
Oxide Producrion Rates
Gas flow rate [L/min]	89YO/Y	139LaO/La	140CeO/Ce	141PrO/Pr	142NdO/Nd	143NdO/Nd	146NdO/Nd	147SmO/Sm	149SmO/Sm	152SmO/Sm	154SmO/Sm	151EuO/Eu	153EuO/Eu	155GdO/Gd	156GdO/Gd	157GdO/Gd	158GdO/Gd	159TbO/Tb	162DyO/Dy	163DyO/Dy	165HoO/Ho	167ErO/Er	169TmO/Tm	172YbO/Yb	175LuO/Lu
0.75	0.00074	0.0018	0.0025	0.00236	0.0021	0.0023	0.0022	0.00067	0.0007	0.00065	0.00067	7.6e-05	7.5e-05	0.00145	0.0015	0.0015	0.00144	0.002	0.00146	0.00144	0.00143	0.00154	0.00062	2.6e-05	0.00129
0.8	0.00066	0.00203	0.00256	0.0022	0.0019	0.0022	0.002	0.00055	0.00062	0.00055	0.00057	6.4e-05	6.2e-05	0.0013	0.0014	0.00147	0.00135	0.0018	0.0013	0.0013	0.0012	0.00137	0.00053	2.3e-05	0.00116
0.85	0.00074	0.0031	0.0031	0.0025	0.00213	0.00229	0.00221	0.00061	0.00066	0.00062	0.00063	6.6e-05	6.5e-05	0.00137	0.0014	0.00151	0.00143	0.0019	0.00138	0.00136	0.00135	0.00145	0.000576	1.9e-05	0.00122
0.9	0.00089	0.02	0.011	0.0044	0.0027	0.0029	0.0028	0.00058	0.00062	0.00057	0.00059	5.9e-05	5.8e-05	0.00158	0.00162	0.0017	0.00162	0.0019	0.0013	0.00126	0.0013	0.00135	0.00053	1.7e-05	0.00115
0.95	0.0012	0.081	0.05	0.011	0.0041	0.0042	0.0041	0.00058	0.00062	0.00058	0.00061	5.5e-05	5.4e-05	0.002	0.002	0.0021	0.00202	0.00207	0.00128	0.00126	0.00123	0.00133	0.00052	1.5e-05	0.00114
1	0.002	0.21	0.17	0.034	0.0086	0.0089	0.0088	0.00061	0.00063	0.0006	0.00064	5.2e-05	5.2e-05	0.003	0.003	0.0031	0.003	0.0025	0.00129	0.00127	0.00126	0.00133	0.00051	1.3e-05	0.00114
2SD
Gas flow rate [L/min]	89YO/Y	139LaO/La	140CeO/Ce	141PrO/Pr	142NdO/Nd	143NdO/Nd	146NdO/Nd	147SmO/Sm	149SmO/Sm	152SmO/Sm	154SmO/Sm	151EuO/Eu	153EuO/Eu	155GdO/Gd	156GdO/Gd	157GdO/Gd	158GdO/Gd	159TbO/Tb	162DyO/Dy	163DyO/Dy	165HoO/Ho	167ErO/Er	169TmO/Tm	172YbO/Yb	175LuO/Lu
0.75	2e-05	0.0001	0.0001	4e-05	0.0001	0.0001	3e-05	1e-05	3e-05	2e-05	1e-05	3e-06	4e-06	2e-05	3e-05	0.0001	2e-05	0.0001	3e-05	3e-05	3e-05	1e-05	2e-05	2e-06	1e-05
0.8	5e-05	4e-05	4e-05	0.0001	0.0001	0.0001	0.0001	6e-05	3e-05	6e-05	4e-05	5e-06	4e-06	0.0001	0.0001	3e-05	2e-05	0.0001	0.0001	0.0001	0.0001	1e-05	2e-05	2e-06	2e-05
0.85	1e-05	0.0001	0.0001	0.0001	3e-05	3e-05	2e-05	3e-05	1e-05	1e-05	1e-05	3e-06	1e-06	4e-05	0.0001	3e-05	3e-05	0.0001	1e-05	1e-05	2e-05	2e-05	4e-06	2e-06	1e-05
0.9	3e-05	0.004	0.001	0.0002	0.0001	0.0002	0.0001	2e-05	1e-05	2e-05	2e-05	1e-06	2e-06	3e-05	4e-05	0.0001	4e-05	0.0001	0.0001	4e-05	0.0001	3e-05	1e-05	1e-06	4e-05
0.95	0.0001	0.008	0.001	0.001	0.0001	0.0001	0.0001	3e-05	2e-05	5e-06	2e-05	1e-06	2e-06	0.0001	0.0001	0.0001	4e-05	3e-05	3e-05	2e-05	3e-05	5e-05	1e-05	2e-06	1e-05
1	0.0001	0.01	0.01	0.001	0.001	0.0009	0.0007	4e-05	3e-05	2e-05	3e-05	4e-06	4e-06	0.0002	0.0002	0.0002	0.0001	0.0001	2e-05	2e-05	1e-05	4e-05	1e-05	3e-06	1e-05
NIST 610				16-F-6 monazite
Oxide Producrion Rates				Oxide Producrion Rates
Gas flow rate [L/min]	232ThO/Th	238UO/U		Gas flow rate [L/min]	232ThO/Th	238UO/U
0.75	0.005	0.0044		0.75	0.0047	0.0041
0.8	0.0064	0.0044		0.8	0.0053	0.0043
0.85	0.0083	0.0044		0.85	0.0069	0.0043
0.9	0.016	0.0063		0.9	0.017	0.0059
0.95	0.035	0.011		0.95	0.034	0.01
1	0.086	0.025		1	0.085	0.024
2SD				2SD
Gas flow rate [L/min]	232ThO/Th	238UO/U		Gas flow rate [L/min]	232ThO/Th	238UO/U
0.75	0.0008	0.0007		0.75	0.0004	0.0004
0.8	0.0015	0.0007		0.8	0.0003	0.0007
0.85	0.001	0.0009		0.85	0.0003	0.0003
0.9	0.003	0.0008		0.9	0.001	0.0001
0.95	0.004	0.002		0.95	0.001	0.001
1	0.014	0.003		1	0.008	0.002

## Sheet: Silicate
Results of LA-ICP-MS analyses of the silicate
R33 zircon
Oxide Producrion Rates
Gas flow rate [L/min]	89YO/Y	167ErO/Er	169TmO/Tm	172YbO/Yb	175LuO/Lu	179HfO/Hf	232ThO/Th	238UO/U
0.75	0.00109627	0.00164375	0.000968636	0.000265814	0.00156425	0.00436944	0.00643697	0.00568629
0.8	0.00116048	0.00195199	0.00112393	0.000328116	0.0016087	0.00428616	0.00687991	0.00564292
0.85	0.00112521	0.00155926	0.000818214	0.000258592	0.00162402	0.00440098	0.00799822	0.00563923
0.9	0.00155687	0.00170841	0.000841715	–	0.00168991	0.00422521	0.0100655	0.00618331
0.95	0.00173819	0.00237747	0.00110033	–	0.00169706	0.0044856	0.0240482	0.00871218
1	0.00262085	0.00254149	0.0012812	–	0.0017837	0.00460745	0.0770472	0.0221317
2SD
Gas flow rate [L/min]	89YO/Y	139LaO/La	90YO/Y	140LaO/La	91YO/Y	179HfO/Hf	232ThO/Th	238UO/U
0.75	8.62421e-05	0.000513757	0.000416919	6.34861e-05	0.000253699	0.000544593	0.000659527	0.0008554
0.8	0.000232629	0.00157602	0.000954063	0.000263665	0.000397121	0.000498001	0.000523371	0.000308269
0.85	0.000124544	0.000346175	8.44765e-05	0.00012089	0.000526525	7.06731e-05	0.00209889	0.000948722
0.9	0.000775546	0.000926088	0.000513742	–	0.000415011	0.000477313	0.00272498	0.000677526
0.95	0.000245773	0.000862513	0.00138619	–	0.000726834	0.000802016	0.00446774	0.00243784
1	0.000214684	0.000836809	0.00101096	–	0.000705683	0.000321899	0.0107983	0.00270795
NIST 610				–: under detection limit
Oxide Producrion Rates
Gas flow rate [L/min]	232ThO/Th	238UO/U
0.75	0.00650046	0.00549453
0.8	0.00679583	0.00574069
0.85	0.00802519	0.00559146
0.9	0.0111567	0.00634436
0.95	0.0230564	0.00836635
1	0.0693183	0.0192551
2SD
Gas flow rate [L/min]	232ThO/Th	238UO/U
0.75	0.0013643	0.000489346
0.8	0.00035476	0.000485663
0.85	0.00105023	0.000528192
0.9	0.0010355	0.000908046
0.95	0.00219836	0.000612138
1	0.00350222	0.00191289
