# Supplementary material for: Unraveling the mechanism and impact of oxide production in LA-ICP-MS by comprehensive analysis of REE-Th-U phosphates
Source: Royal Society of Chemistry journal article supplement (doi:10.1039/c7ja00182g), 2017-01-01
Supplement: c7ja00182g3.xlsx [file c7ja00182g3.xlsx]

## Sheet: Sheet1
Concentrations of REE, Th and U of the natural monazites in pegmatite and granite from Japan and meta-conglomerate from the Yilgarn Craton.											†Ce concentrations were measured by Electron microprobe to be used as an internal standard
Uncorrected values for oxide interferences
Concentration
[ppm]	La	Ce†	Pr	Nd	Sm	Eu	Gd	Tb	Dy	Ho	Er	Tm	Yb	Lu	Th	U
Monazite from Pegmatite	1.1.E+05	2.6.E+05	3.2.E+04	1.4.E+05	4.5.E+04	7.8.E+00	3.3.E+04	3.8.E+03	1.2.E+04	9.4.E+02	9.1.E+02	5.0.E+01	2.0.E+02	1.8.E+01	5.4.E+04	4.9.E+03
Monazite from Granite	1.7.E+05	3.1.E+05	3.5.E+04	1.5.E+05	2.6.E+04	3.8.E+02	1.5.E+04	1.5.E+03	5.9.E+03	8.2.E+02	1.5.E+03	1.2.E+02	5.0.E+02	4.3.E+01	2.3.E+04	4.1.E+02
Monazite from Meta-conglomerate	1.7.E+05	2.8.E+05	2.6.E+04	9.4.E+04	2.4.E+04	4.2.E+03	2.0.E+04	2.2.E+03	6.8.E+03	5.5.E+02	5.3.E+02	2.6.E+01	9.8.E+01	9.6.E+00	7.4.E+04	1.3.E+04
Corrected for oxide interferences using REEO+/REE+ determined for the synthetic phosphates
Concentration
[ppm]	La	Ce	Pr	Nd	Sm	Eu	Gd	Tb	Dy	Ho	Er	Tm	Yb	Lu	Th	U
Monazite from Pegmatite	-	-	-	-	-	-	3.3.E+04	3.7.E+03	1.2.E+04	9.3.E+02	9.1.E+02	5.0.E+01	1.4.E+02	9.5.E+00	-	-
Monazite from Granite	-	-	-	-	-	-	1.4.E+04	1.4.E+03	5.9.E+03	8.2.E+02	1.5.E+03	1.2.E+02	4.7.E+02	3.9.E+01	-	-
Monazite from Meta-conglomerate	-	-	-	-	-	-	1.9.E+04	2.2.E+03	6.7.E+03	5.5.E+02	5.2.E+02	2.6.E+01	5.7.E+01	3.4.E+00	-	-
	Considered interferences
	from	141PrO/Pr	143NdO/Nd	147SmO/Sm	149SmO/Sm	151EuO/Eu	153EuO/Eu	157GdO/Gd	159TbO/Tb
	to	157Gd	159Tb	163Dy	165Ho	167Er	169Tm	173Yb	175Lu
